# Supplementary material for: The Clostridioides difficile Cysteine-Rich Exosporium Morphogenetic Protein, CdeC, Exhibits Self-Assembly Properties That Lead to Organized Inclusion Bodies in Escherichia coli
Source: PubMed Central journal article supplement (PMC7677010; doi:10.1128/msphere.01065-20), 2020-11-18

**Fig. S4**

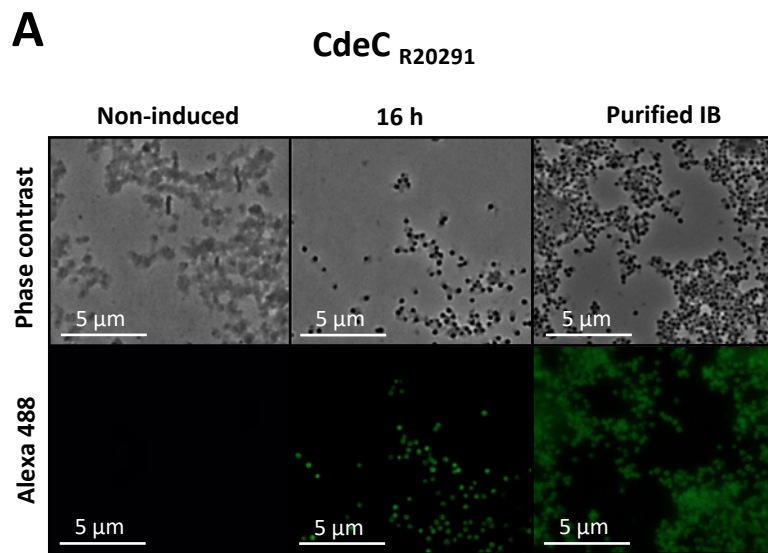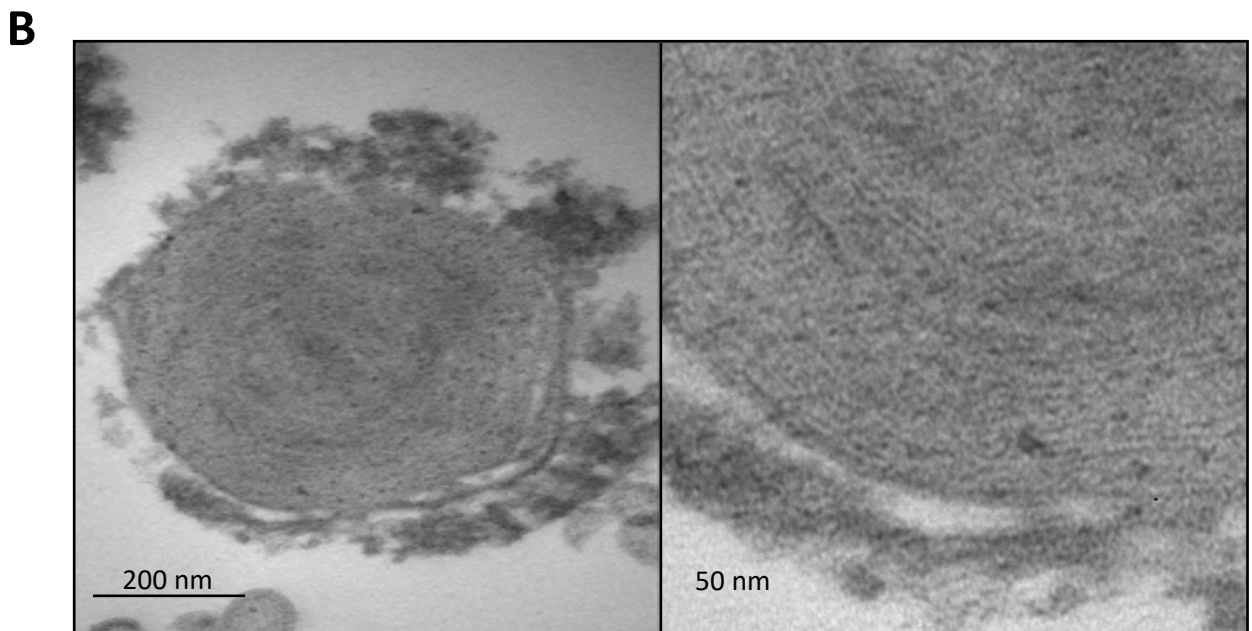

Supplement: mSphere.01065-20-sf004.pdf [file mSphere.01065-20-sf004.pdf]
