# Supplementary material for: The Clostridioides difficile Cysteine-Rich Exosporium Morphogenetic Protein, CdeC, Exhibits Self-Assembly Properties That Lead to Organized Inclusion Bodies in Escherichia coli
Source: PubMed Central journal article supplement (PMC7677010; doi:10.1128/msphere.01065-20), 2020-11-18
Supplement: mSphere.01065-20-st002.pdf [file mSphere.01065-20-st002.pdf]

Table S2 List of primers used in this study

| Primer name            | Primer sequence <sup>a</sup> 5'-3'                                                        | Position <sup>b</sup> | Gene <sup>c</sup>    | Use                                                                                                                                                                                                |
|------------------------|-------------------------------------------------------------------------------------------|-----------------------|----------------------|----------------------------------------------------------------------------------------------------------------------------------------------------------------------------------------------------|
| FP-cdeC-CD0926-NcoI V2 | CGACCATGGCCATGCAAG<br>ATTATAAAAAAAAAATAAA<br>AGAAGAATG                                    | +3 to +36             | <i>cdeC</i> -CD0926  | The forward primer used to clone <i>cdeC</i> of in the expression vector pETM11.                                                                                                                   |
| RP-CdeC-CD0926-XhoI V2 | GCGACTCGAGTCTGTGGC<br>AACTTGGCTTTCC                                                       | -1195 to -1215        | <i>cdeC</i> -CD0926  | The reverse primer used to clone <i>cdeC</i> in the expression vector pETM11.                                                                                                                      |
| FP-CD1067-NdeI         | GACCATATGCAAGATTAT<br>AAAAAAAAATAAAGAAG<br>AATGATGAATCAGC                                 | +3 to +45             | <i>cdeC</i> -CD0926  | Forward primer used to clone <i>cdeC</i> in the expression vector pET22b.                                                                                                                          |
| RP-CD1067-XhoI         | GACCTCGAGTCTGTGGCA<br>ACTTGGCTTTCCACTTC                                                   | -1189 to -1215        | <i>cdeC</i> -CD0926  | The reverse primer used to clone <i>cdeC</i> in the expression vector pET22b.                                                                                                                      |
| FP-cdeMpM11            | TCTTTATTTTCAGGGCGC<br>CATGGATATGGAAAATAA<br>AAAATATGCAAATGGTGG<br>TTATTCAGA               | +3 to +38             | <i>cdeM</i> -CD1478  | The forward primer used to clone <i>cdeM</i> in the expression vector pETM11.                                                                                                                      |
| Rp-cdeMpM11            | TGGTGGTGGTGGTGGCTCG<br>AGTTTTCTACAGCAGTTA<br>CAATTACATTTATGGCAT<br>TTATGG                 | -453 to -492          | <i>cdeM</i> - CD1478 | The forward primer used to clone <i>cdeM</i> in the expression vector pETM11.                                                                                                                      |
| FP-cdeApM11            | TCTTTATTTTCAGGGCGC<br>CATGGTGAAAAATAATAA<br>TTTAAATTGTGCTGCTAC<br>TAATTGTGCTTATAATAC<br>T | +3 to +51             | <i>cdeA</i> -CD2262  | The forward primer used to clone <i>cdeA</i> in the expression vector pETM11.                                                                                                                      |
| RP-cdeApM11            | TGGTGGTGGTGGTGGCTCG<br>AGTTTCATTTCAAAGTT<br>TCACAACCTGCATTTCTTT<br>CATTTATATGAAC          | -259 to -306          | <i>cdeA</i> -CD2262  | The reverse primer used to clone <i>cdeA</i> in the expression vector pETM11.                                                                                                                      |
| FP-M1-D100 CdeC-NdeI   | GACCATATGCAAGATTAT<br>AAAAAAAAATAAAGAAG<br>AATGATGAATCAGC                                 | +3 to +45             | <i>cdeC</i> -CD0926  | The forward primer used to clone truncated sequences of <i>cdeC</i> in the expression vector pET22b, corresponding to coding nucleotides for M1 to D100 of the complete sequence of <i>cdeC</i> .  |
| RP-M1-D100 CdeC-XhoI   | GACCTCGAGATCCATTTT<br>ACATGGTTTACAATCACA<br>TTTAC                                         | -267 to -297          | <i>cdeC</i> -CD0926  | The reverse primer used to clone the truncated sequence of <i>cdeC</i> in the expression vector pET22b, corresponding to coding nucleotides for M1 to D100 of the complete sequence of <i>cdeC</i> |
| FP-M1-N214 CdeC-NdeI   | GACCATATGCAAGATTAT<br>AAAAAAAAATAAAGAAG<br>AATGATGAATCAGC                                 | +3 to +45             | <i>cdeC</i> -CD0926  | The forward primer used to clone truncated sequences of <i>cdeC</i> in the expression vector pET22b, corresponding to coding nucleotides for M1 to N214 of the complete sequence of <i>cdeC</i> .  |

|                                    |                                                        |                |                     |                                                                                                                                                                                                     |
|------------------------------------|--------------------------------------------------------|----------------|---------------------|-----------------------------------------------------------------------------------------------------------------------------------------------------------------------------------------------------|
| RP-M1-N214<br>CdeC- <i>Xho</i> I   | <u>GACCTCGAGG</u> TTTCTTCC<br>TACTATATCTCCTAATGG<br>G  | - 610 to -639  | <i>cdeC</i> -CD0926 | The reverse primer used to clone truncated sequences of <i>cdeC</i> in the expression vector pET22b, corresponding to coding nucleotides for M1 to N214 of the complete sequence of <i>cdeC</i> .   |
| FP-P206-R405<br>CdeC- <i>Nde</i> I | <u>GACCATATG</u> CCATTAGGA<br>GATATAGTAGGAAGAAA<br>CTG | +613 to +639   | <i>cdeC</i> -CD0926 | The forward primer used to clone truncated sequences of <i>cdeC</i> in the expression vector pET22b, corresponding to coding nucleotides for P206 to R405 of the complete sequence of <i>cdeC</i> . |
| RP-P206-R405<br>CdeC- <i>Xho</i> I | <u>GACCTCGAGT</u> CTGTGGCA<br>ACTTGGCTTTCCACTTC        | -1189 to -1215 | <i>cdeC</i> -CD0926 | The reverse primer used to clone truncated sequences of <i>cdeC</i> in the expression vector pET22b, corresponding to coding nucleotides for P206 to R405 of the complete sequence of <i>cdeC</i> . |

<sup>a</sup> Restriction site is marked by an underline.

<sup>B</sup> the nucleotide position number begins from the first codon and refers to the relevant position within the respective gene sequence.

<sup>C</sup> Database: Accession No. FN545816.1
